# Supplementary material
Source: PubMed Central journal article supplement (PMC1478167)
Supplement: 7601116s3.pdf [file 7601116s3.pdf]

| Capsaicin-sensitive neurons                             | TREK-1 +/+ |     |    | TREK-1 -/- |     |    | Unpaired t test<br>p |
|---------------------------------------------------------|------------|-----|----|------------|-----|----|----------------------|
|                                                         | mean       | sem | n  | mean       | sem | n  |                      |
| <b>Measurement at +23°C</b>                             |            |     |    |            |     |    |                      |
| Membrane resting potential (mV)                         | -52.5      | 2.5 | 10 | -47.1      | 3.5 | 11 | 0.2327               |
| Capacitance (pF)                                        | 17.0       | 1.4 | 10 | 16.0       | 1.6 | 11 | 0.6464               |
| Action potential threshold (mV)                         | -16.8      | 1.3 | 10 | -17.1      | 1.4 | 15 | 0.9236               |
| Depolarisation induced by capsaicin (mV)                | 26.8       | 4.8 | 8  | 23.8       | 3.7 | 6  | 0.6492               |
| <b>Measurement at +43°C</b>                             |            |     |    |            |     |    |                      |
| Depolarisation induced by changing the temperature (mV) | 7.3        | 2.9 | 6  | 8.0        | 4.1 | 5  | 0.8895               |
| Capacitance (pF)                                        | 18.3       | 1.6 | 7  | 16.8       | 1.2 | 6  | 0.4816               |
| Action potential threshold (mV)                         | -17.1      | 1.7 | 8  | -19.2      | 2.1 | 8  | 0.4499               |
